# Supplementary material
Source: PubMed Central journal article supplement (PMC5394871)

## Gene panel sequencing improves the diagnostic work-up of patients with idiopathic erythrocytosis and identifies new mutations

Carme Camps,<sup>1,2</sup> Nayia Petousi,<sup>3</sup> Celeste Bento,<sup>4</sup> Holger Cario,<sup>5</sup> Richard R. Copley,<sup>1,2</sup> Mary Frances McMullin,<sup>6</sup> Richard van Wijk,<sup>7</sup> WGS500 Consortium,<sup>8</sup> Peter J. Ratcliffe,<sup>3</sup> Peter A. Robbins,<sup>9</sup> and Jenny C. Taylor<sup>1,2</sup>

<sup>1</sup>National Institute for Health Research (NIHR) Comprehensive Biomedical Research Centre, Oxford, UK; <sup>2</sup>Wellcome Trust Centre for Human Genetics, University of Oxford, UK; <sup>3</sup>Nuffield Department of Medicine, University of Oxford, UK; <sup>4</sup>Hematology Department, Centro Hospitalar e Universitário de Coimbra, Portugal; <sup>5</sup>Department of Pediatrics and Adolescent Medicine, University Medical Center, Ulm, Germany; <sup>6</sup>Centre for Cancer Research and Cell Biology, Queen's University, Belfast, UK; <sup>7</sup>Department of Clinical Chemistry and Hematology, University Medical Center Utrecht, the Netherlands; <sup>8</sup>A list of members and affiliations is provided in the Online Supplementary Information; and <sup>9</sup>Department of Physiology, Anatomy and Genetics, University of Oxford, UK

*\*CC and NP contributed equally to this work*

*\*\*PJR, PAR and JCT jointly supervised this work*

©2016 Ferrata Storti Foundation. This is an open-access paper. doi:10.3324/haematol.2016.144063

Received: February 9, 2016.

Accepted: July 26, 2016.

Pre-published: September 20, 2016.

Correspondence: nayia.petousi@ndm.ox.ac.uk

---

# Gene panel sequencing improves the diagnostic work-up of patients with idiopathic erythrocytosis and identifies new mutations

Carme Camps, Nayia Petousi, Celeste Bento, Holger Cario, Richard R. Copley, Mary Frances McMullin, Richard vanWijk, WGS500 consortium, Peter J. Ratcliffe, Peter A. Robbins, and Jenny C. Taylor

## Supplementary Information:

### Whole genome sequencing (WGS) – Supplementary Methods and Results:

WGS500 is a project aimed at evaluating the clinical utility of whole genome sequencing across a number of human diseases. In WGS500, the genomes of 500 patients and family members, spanning a range of diseases including rare (inherited) disorders, severe and early onset immunological conditions and cancer, were sequenced with the hope of identifying variants in novel genes or pathways to inform diagnosis, prognosis, and treatment.

Ten idiopathic erythrocytosis patient samples were whole-genome sequenced as part of the WGS500 project. The samples included 3 sporadic cases, 2 unrelated families exhibiting an autosomal pattern of inheritance of erythrocytosis and 2 cases that were distant relatives. These patients were specifically selected as having either elevated or inappropriately normal erythropoietin (Epo) levels.

Details about the patients and family pedigrees, as well as the methodology employed in the WGS500 project is described in detail elsewhere<sup>1</sup>. Briefly, samples were sequenced at a 30X depth using the Illumina HiSeq2000. Reads were mapped to the human reference genome (Hg19) using STAMPY<sup>2</sup>, and variants were identified and annotated using Platypus<sup>3</sup> and ANNOVAR<sup>4</sup>. We first searched for heterozygous or homozygous variants in candidate genes: *HIF1A*, *EPAS1*, *HIF3A*, *HIF1B*, *FIH*, *EGLN1*, *EGLN2*, *EGLN3*, *VHL*, *EPO*, *EPOR*, *JAK2*, *HBB*, *HBA1*, *HBA2* and *BPGM* and then extended our search for rare coding variants in any gene. For the sporadic cases, a recessive model was favored, searching for rare homozygous variants that had to fulfil the following criteria: not reported in 1000G database or reported with a frequency <0.05, not reported in dbSNP and not present as homozygous in the WGS500 union file (file containing all variants called across all samples sequenced in the WGS500 project). The rare homozygous variants in protein coding regions were further filtered by requiring a polyphen2 score >0.5 and prioritized based on gene function. For families, a dominant inheritance pattern was assumed. Search was focused on rare variants (1000G frequency <0.05), giving priority to shared familial variants and genes with variants in common between different patients.

Candidate variants identified by WGS are shown in Table S 2. The variants found in *BPGM* and *EPO* have been reported in other publications from our group<sup>1,5</sup>. *BPGM* has previously been shown to be affected in erythrocytosis<sup>6</sup>. The variant was detected in one of the sporadic cases and further experiments demonstrated that it was impairing BPGM function<sup>5</sup>. The variant in *EPO* was found in common among the patients of the two unrelated families and further studies demonstrated that

the variant segregated with the erythrocytosis phenotype in both families<sup>1</sup>. These results are further supported by segregation of the same variant in an additional family, reported at an international conference<sup>7</sup>. Overall, this is the first disease-causing variant reported in the *EPO* gene.

WGS also identified rare coding homozygous variants in other novel genes not previously associated with erythrocytosis, which are currently of unknown functional significance: *GFI1b*, *KDM6A* and *BHLHE41*. The variant in *GFI1b* was identified in a sporadic case and prioritized among 24 other rare homozygous protein coding variants found in the same patient due the function of this gene: *GFI1b* is an essential transcriptional regulator of erythroid and megakaryocyte development<sup>8</sup> which affects hematopoiesis as shown in knock-out mice studies<sup>9</sup>. The variant p.C168F found in this patient would remove a conserved cysteine of a zinc finger domain of this protein. The variant in *KDM6A*, an X-linked gene, was identified in hemizygous status in a male child who presented as a sporadic case and we subsequently showed that this variant was inherited from his mother. The variant was prioritized among 4 other rare homozygous protein coding variants due to the connection of *KDM6A* with oxygen sensing pathways. Indeed, *KDM6A* is a chromosome X-coded JmJC-domain-containing demethylase, which is oxygen-dependent and also upregulated in hypoxia<sup>10</sup>, with variants affecting its function found in renal cancer<sup>11, 12</sup> and the congenital Kabuki syndrome<sup>13, 14</sup>. The two identified variants in *BHLHE41* (*DEC2*) are located in the 3'UTR and co-occur in the homozygous state in two patients with erythrocytosis who are distantly related (female patient: first cousin of the father of the male patient). They were not found as homozygous in any of the other WGS500 samples. There were no other candidate variants (rare homozygous or heterozygous variants) in common between both patients or located within the same gene in both patients. *BHLHE41* (*DEC2*) is a hypoxia-regulated transcription factor which interacts with HIF and causes proteasomal inhibition of HIF and transcriptional suppression of HIF-target genes<sup>15</sup>, and which has also been linked to renal cancer susceptibility<sup>16</sup> and Ethiopian high altitude adaptation<sup>17</sup>. The candidacy of this gene may not appear as strong as for most of the other genes, but its link with the HIF pathway prompted us to include *BHLHE41* together with *EPO*, *GFI1b* and *KDM6A* in the targeted NGS erythrocytosis gene panel and explore its variation across a larger cohort of erythrocytosis patients.

### **Erythrocytosis gene panel – Supplementary Methods:**

#### **Patient samples:**

A hundred and twenty five samples were included, obtained from 4 idiopathic erythrocytosis databases (UK, Portugal, Germany and the Netherlands). Participants gave informed consent according to the declaration of Helsinki and appropriate ethical approval was gained for each center where samples were collected. Relevant ethics committee reference numbers have been provided to the journal editors. Of those, 90 (72.0%) were male and 35 (28.0%) were female. To the best of our knowledge, the age of diagnosis was known for 109 of the patients, mostly comprised between childhood and early adulthood (median age: 24; age range: 1 - 57). There were 16 patients also included, who at the time of study were 60 years old or older; these had long-standing erythrocytosis (of several decades) with no identifiable cause. For inclusion, patients had to have an elevated red cell mass of > 125% predicted, and a hemoglobin (Hb) > 180 g/L and

hematocrit (Hct) > 0.52 L/L in adult males or Hb > 160 g/L and Hct > 0.48 L/L in adult females, or Hb and Hct levels above the 99<sup>th</sup> centile of age-appropriate reference values in children, at the time of diagnosis. At the time of sampling for this study, some patients had normal Hb levels due to previous venesection. Epo reference levels vary from laboratory to laboratory and Epo levels can also vary within an individual with repeated measures, so patients were included irrespective of Epo levels, with the median Epo level being 12.4 mIU/ml. The investigation algorithm followed at each Centre prior to registration as idiopathic is shown in Figure S1.

#### **Ion Torrent sequencing:**

The custom panel primer pool for idiopathic erythrocytosis was used together with the Ion Ampliseq Library kit 2.0 (*Thermo Fisher*) to create libraries suitable for sequencing on the Ion Torrent platform (*Thermo Fisher*). For each patient DNA sample, two amplification reactions were set up, one for each of the two multiplex pools. Each amplification reaction contained 10ng of genomic DNA, 1X primer pool and 1X Ion Ampliseq HiFi Master mix in a total volume of 10µl complemented with water. A peqSTAR 96 Universal Gradient Thermocycler (*Peqlab*) was used and cycling conditions included a first step to activate the enzyme (99°C for 2 minutes) followed by 17 cycles of amplification (99°C for 15 seconds, 60°C for 4 minutes). The two amplification products resulting from each DNA sample were subsequently combined in a single tube and library preparation was completed according to Ion Ampliseq Library kit 2.0 manual. Ion Xpress barcodes Adapters (*Thermo Fisher*) were used during adapter ligation to allow multiplexing during sequencing. The quality and concentration of the final libraries were assessed using a High sensitivity DNA kit (*Agilent Technologies*) and Agilent 2100 Bioanalyzer (*Agilent Technologies, Santa Clara, California, USA*). The concentration of each library was normalized to 100 pM and pools of 8 libraries were made by combining equal amounts. Each pool was further diluted to 10pM and used for template preparation, using the Ion PGM Template OT2 200 kit and the Ion OneTouch 2 instrument (*Thermo Fisher*), followed by enrichment on template-positive Ion Sphere Particles with the Ion OneTouch ES (*Thermo Fisher*). The template was further processed using the Ion PGM sequencing 200 kit v2, loaded onto an Ion 316 chip and sequenced on an Ion PGM instrument (500 flows), as per the manufacturer's protocol.

#### **Analysis of Ion Torrent Sequencing data:**

The Torrent Suite Software (*Thermo Fisher*) was used for basic quality control of the sequencing data generated by the Ion PGM instrument as well as for read alignment to the human genome (Hg19). The alignment was restricted to the genomic coordinates enclosed by our custom panel. An individual BAM file was generated for each sample and imported into the Ion Reporter Software v4.2 (*Thermo Fisher*) for variant calling, performed using the germline workflow for single samples and the default parameters. The resulting vcf files were further annotated with ANNOVAR<sup>4</sup>. Variants were subsequently filtered, selecting for further analysis only the variants fulfilling all of the following conditions: confidence ≥ 40, read depth ≥ 20, frequency in 1000 Genomes (1000G) ≤ 3% and frequency in NHLBI ESP exomes (6500si) ≤ 3%.

SIFT, PolyPhen-2 and Provean were used to evaluate the potential of causality of non-synonymous variants. For SIFT and Polyphen-2 HDIV, we used the scores and cut-offs obtained from the LJB23

database in ANNOVAR. According to this, a variant is considered deleterious (D) by SIFT when sift score  $\leq 0.05$  and tolerated (T) when sift score  $> 0.05$ . For PolyPhen 2 HDIV, a variant is classified as probably damaging (D) when pp2\_hdiv score  $\geq 0.957$ , possibly damaging (P) when  $0.453 \leq$  pp2\_hdiv score  $\leq 0.956$ , or benign (B) when pp2\_hdiv score  $\leq 0.446$ . Regarding Provean (<http://provean.jcvi.org>), we used the default score threshold set at -2.5 for binary classification of the variants (i.e. deleterious vs neutral).

Synonymous variants were further investigated for possible splicing effects using Human Splicing Finder (<http://www.umd.be>), NetGene2 (<http://www.cbs.dtu.dk>) and FSPLICE (<http://linux1.softberry.com>).

### **Sanger sequencing:**

The FastStart Taq DNA polymerase kit (Roche) was used for setting up PCR reactions, each one containing 40ng of DNA, 1X buffer supplied with magnesium, 0.2mM dNTP (each), 1.25U of Taq polymerase and 0.4pM of forward and reverse primers. Some reactions aimed to amplify genomic regions with high GC content were complemented with 1X GC rich solution, as indicated in Supplementary Table 2. Cycling conditions included a first step at 95°C for 2 minutes followed by 35 cycles of amplification (95°C for 30 seconds, Ta for 30 seconds as specified in Supplementary Table 2 for each pair of primers, 72°C for 30 seconds) and a final amplification at 72°C for 6 minutes. All PCR products (5µl) were run on a 1% agarose gel. They were then cleaned in a reaction containing 15µl of PCR product, 0.1µl exonuclease I (*NEB*), 1µl shrimp alkaline phosphatase (SAP) (*Affymetrix*), 1µl 10X SAP buffer and 0.9µl of water, which was incubated at 37°C for 30 minutes and 80°C for 15 minutes. Sanger sequencing reactions were set up with 1µl of clean PCR product, 0.5µl of 3.3pM primer, 1.5µl of 5X buffer, 1µl of Big Dye (*Applied Biosystems*) and 6µl of water. Reactions were then incubated at 96°C for 1 minute, followed by 35 cycles of amplification (96°C for 30 seconds, 50°C for 15 seconds and 60°C for 4 minutes). Products were precipitated for 15 minutes at room temperature with a mixture containing 2µl of 125mM EDTA, 2µl of 3M sodium acetate and 50µl of ethanol and pelleted by centrifugation for 30 minutes at 3000 rcf and 4°C. Pellets were washed once with 70µl of 70% ethanol, centrifuged for 15 minutes at 1650 rcf at 4°C and allowed to dry at room temperature for 1 hour. Once dry, they were frozen and submitted to Oxford University Zoology department for final processing.

### **WGS500 consortium**

#### **Steering committee**

Peter Donnelly (Chair)<sup>1</sup>, John Bell<sup>2</sup>, David Bentley<sup>3</sup>, Gil McVean<sup>1</sup>, Peter Ratcliffe<sup>1</sup>, Jenny Taylor<sup>1,4</sup>, Andrew Wilkie<sup>4,5</sup>

#### **Operations committee**

Peter Donnelly<sup>1</sup> (Chair) John Broxholme<sup>1</sup>, David Buck<sup>1</sup>, Jean-Baptiste Cazier<sup>1</sup>, Richard Cornall<sup>1</sup>, Lorna Gregory<sup>1</sup>, Julian Knight<sup>1</sup>, Gerton Lunter<sup>1</sup>, Gilean McVean<sup>1</sup>, Jenny Taylor<sup>1,4</sup>, Ian Tomlinson<sup>1,4</sup>, Andrew Wilkie<sup>4,5</sup>

## Sequencing & experimental follow up

David Buck<sup>1</sup> (Lead) Christopher Allan<sup>1</sup>, Moustafa Attar<sup>1</sup>, Angie Green<sup>1</sup>, Lorna Gregory<sup>1</sup>, Sean Humphray<sup>3</sup>, Zoya Kingsbury<sup>3</sup>, Sarah Lamble<sup>1</sup>, Lorne Lonie<sup>1</sup>, Alistair Pagnamenta<sup>1</sup>, Paolo Piazza<sup>1</sup>, Guadelupe Polanco<sup>1</sup>, Amy Trebes<sup>1</sup>

## Data analysis

Gil McVean<sup>1</sup> (Lead), Peter Donnelly<sup>1</sup>, Jean-Baptiste Cazier<sup>1</sup>, John Broxholme<sup>1</sup>, Richard Copley<sup>1</sup>, Simon Fiddy<sup>1</sup>, Russell Grocock<sup>3</sup>, Edouard Hatton<sup>1</sup>, Chris Holmes<sup>1</sup>, Linda Hughes<sup>1</sup>, Peter Humburg<sup>1</sup>, Alexander Kanapin<sup>1</sup>, Stefano Lise<sup>1</sup>, Gerton Lunter<sup>1</sup>, Hilary Martin<sup>1</sup>, Lisa Murray<sup>3</sup>, Davis McCarthy<sup>1</sup>, Andy Rimmer<sup>1</sup>, Natasha Sahgal<sup>1</sup>, Ben Wright<sup>1</sup>, Chris Yau<sup>6</sup>

<sup>1</sup> The Wellcome Trust Centre for Human Genetics, Roosevelt Drive, Oxford, OX3 7BN, UK.

<sup>2</sup> Office of the Regius Professor of Medicine, Richard Doll Building, Roosevelt Drive, Oxford, OX3 7LF, UK

<sup>3</sup> Illumina Cambridge Ltd., Chesterford Research Park, Little Chesterford, Essex, CB10 1XL, UK

<sup>4</sup> NIHR Oxford Biomedical Research Centre, Oxford, UK.

<sup>5</sup> Weatherall Inst of Molecular Medicine, University of Oxford; John Radcliffe Hospital Headington, Oxford OX3 9DS, UK

<sup>6</sup> Imperial College London, South Kensington Campus, London, SW7 2AZ. UK

## Supplementary Figure Legends:

**Figure S1. Algorithms used for the diagnosis of erythrocytosis in the different centers participating in this study:** University Medical Center, Ulm (Germany), Queen's University, Belfast (UK), University Medical Center (The Netherlands) and Centro Hospitalar e Universitário de Coimbra (Portugal). Patients for whom no diagnosis was reached following these algorithms were classified as having idiopathic erythrocytosis. (PV: Polycythemia Vera; ECT 1-4: erythrocytosis type 1-4; Hb: hemoglobin; Epo: erythropoietin; Hct: hematocrit; SD: standard deviation; SaO<sub>2</sub>: saturation of oxygen; P50: partial pressure of oxygen for which 50% of Hb is saturated with oxygen; 2,3-BPG: 2,3-bisphosphoglycerate; O<sub>2</sub>: oxygen; ECC: erythroid colony culture; MRI: magnetic resonance imaging).

## Supplementary Tables:

**Table S 1:** Primers used for Sanger sequencing validation

| Sequence (5'→3')        | F/R | Ta | Size amplicon (bp) | Chr | Start    | End      | Gene    | GC rich solution added |
|-------------------------|-----|----|--------------------|-----|----------|----------|---------|------------------------|
| TGCCTTACGATGACAGAAATGG  | F   | 58 | 342                | 9   | 5022000  | 5022341  | JAK2    | no                     |
| AAACACACACGCCAGCCATA    | R   |    |                    |     |          |          |         |                        |
| GGTTTTAGTGGCGCATGAT     | F   | 55 | 251                | 9   | 5050678  | 5050928  | JAK2    | no                     |
| ACAAATCAAAAGGCATGGGTAA  | R   |    |                    |     |          |          |         |                        |
| AGGAAGCGAATAAGGTACAGATT | F   | 55 | 239                | 9   | 5054624  | 5054862  | JAK2    | no                     |
| TCTTTATGTTTCCTCTTGACCA  | R   |    |                    |     |          |          |         |                        |
| CCTTTGCTCAGAGGGACCTG    | F   | 55 | 181                | 12  | 26275882 | 26276062 | BHLHE41 | no                     |
| ATGCGTTCCACTCGGGATT     | R   |    |                    |     |          |          |         |                        |

|                           |   |    |     |    |           |           |       |     |
|---------------------------|---|----|-----|----|-----------|-----------|-------|-----|
| GTGCCATATGCACAGTGTATGC    | F |    |     |    |           |           |       |     |
| CGAGGAGTGCGAATGGTCAG      | R | 58 | 225 | 12 | 58109416  | 58109640  | OS9   | no  |
| GAACGGCAGAGAGAGATGGA      | F |    |     |    |           |           |       |     |
| TTCTTTTAGCCCGTCAGCCT      | R | 55 | 267 | 12 | 58112016  | 58112282  | OS9   | no  |
| CTTCGTGAGAGCCCTTGGAG      | F |    |     |    |           |           |       |     |
| CCTTCTGAGAGCCCTTGGAG      | R | 58 | 184 | 19 | 41306536  | 41306719  | EGLN2 | no  |
| GTCTCCAGGTACGCCATCAC      | F |    |     |    |           |           |       |     |
| TTTAAGCTGTCTGCCATGCG      | R | 58 | 425 | 19 | 41313381  | 41313805  | EGLN2 | no  |
| GAACAGCTCCGCGCAAATAG      | F |    |     |    |           |           |       |     |
| TGCTTTTGTCTAAAAATCTCCGTCA | R | 55 | 273 | X  | 44921898  | 44922170  | KDM6A | no  |
| AGAGTGCCTAGCGTCTCTCA      | F |    |     |    |           |           |       |     |
| TGGTCAGGTTTGTGCGGTTA      | R | 55 | 232 | X  | 44922784  | 44923015  | KDM6A | no  |
| ACTTACTTTTGTGCGGCCAT      | F |    |     |    |           |           |       |     |
| CACGGCATCTGTGTGGTG        | R | 58 | 285 | 1  | 231556738 | 231557022 | EGLN1 | no  |
| GCCAGATCTCGGCGAAGTAA      | F |    |     |    |           |           |       |     |
| TCAAAACATTGCGACCACCT      | R | 55 | 243 | 14 | 62187140  | 62187382  | HIF1A | no  |
| TGCCTATCAGTTAACTTGGGAGG   | F |    |     |    |           |           |       |     |
| GCCAAAGTACAGAGGTTGC       | R | 58 | 262 | 14 | 62199049  | 62199310  | HIF1A | no  |
| GAGCAGGGGAATGAGGATGG      | F |    |     |    |           |           |       |     |
| ACAGGAGGTGGGGATATGCT      | R | 58 | 248 | 19 | 46811401  | 46811648  | HIF3A | no  |
| GCTCTGGACATATGAGGGCC      | F |    |     |    |           |           |       |     |
| AGAAATGCGGGAGTGTGGAG      | R | 58 | 276 | 19 | 46812418  | 46812693  | HIF3A | no  |
| CAGGGCAGTATCGTTCCTG       | F |    |     |    |           |           |       |     |
| CGTGCACTCCCTCACATA        | R | 58 | 261 | 19 | 46815787  | 46816047  | HIF3A | no  |
| CACCTCCCTTTCTGCCTTGT      | F |    |     |    |           |           |       |     |
| GCTGTGTGTTTTGGAGGCTG      | R | 58 | 291 | 19 | 46823673  | 46823963  | HIF3A | no  |
| CCTGGCATTTGATCCCCACT      | F |    |     |    |           |           |       |     |
| TCTAAATCTGTCTCCACTGCC     | R | 60 | 199 | 19 | 46828688  | 46828886  | HIF3A | no  |
| ACCCCTCTGCGCAAAGTAA       | F |    |     |    |           |           |       |     |
| TCCTTTCTGGGGGAGGAGAA      | R | 55 | 300 | 19 | 46842623  | 46842922  | HIF3A | no  |
| CAAAGCAGGTTGTGTGGC        | F |    |     |    |           |           |       |     |
| GTCGCATGATGGAGGCCTT       | R | 58 | 310 | 2  | 46573851  | 46574160  | EPAS1 | no  |
| CAACCCTGTTCCCTTCTCC       | F |    |     |    |           |           |       |     |
| CTGCTGGAGAAGAGGCTGAG      | R | 58 | 210 | 12 | 111884719 | 111884928 | SH2B3 | no  |
| CTGCCAGAAGACGGACCATT      | F |    |     |    |           |           |       |     |
| GAGGGAAAGTGGAGGTGCTG      | R | 58 | 357 | 12 | 111885165 | 111885521 | SH2B3 | no  |
| TCTCTAGTCTCACGAGGGGT      | F |    |     |    |           |           |       |     |
| CCCAATCCCATTAACGCCG       | R | 55 | 284 | 14 | 62162373  | 62162656  | HIF1A | yes |
| GAGCCTGCCTGCCTTAC         | F |    |     |    |           |           |       |     |
| AGAAAACAGCTCTGATACCTGGT   | R | 58 | 252 | 2  | 46605139  | 46605390  | EPAS1 | no  |
| CGTTTGAGCAGCACTGTGAA      | F |    |     |    |           |           |       |     |
| GGGCTGTGCTTCTTGTCT        | R | 58 | 364 | 2  | 46607245  | 46607608  | EPAS1 | no  |
| AGACACCACTGAAGGAGCA       | F |    |     |    |           |           |       |     |
| GGTGCTGCCAGGTAGAA         | R | 55 | 305 | 2  | 46611521  | 46611825  | EPAS1 | no  |
| GCGGAGAACTGGGACGAG        | F |    |     |    |           |           |       |     |
| GCTTCAGACCGTGTATCGT       | R | 58 | 383 | 3  | 10183544  | 10183926  | VHL   | no  |
| AGCCTCTTGTTCTGTTCTTGT     | F |    |     |    |           |           |       |     |
| TGTTTGCCCTAAACATCACA      | R | 55 | 432 | 3  | 10191403  | 10191834  | VHL   | no  |

|                            |   |    |     |    |           |           |       |     |
|----------------------------|---|----|-----|----|-----------|-----------|-------|-----|
| AGAGACGTGGGGATGAAGGA       | F |    |     |    |           |           |       |     |
| TTCTGTGGAATGTGCTGGGG       | R | 58 | 263 | 7  | 100319096 | 100319358 | EPO   | no  |
| GCAGGAGGGAGAGGGTGA         | F |    |     |    |           |           |       |     |
| AAGTGTCGGCTCCTACTCAC       | R | 60 | 255 | 7  | 100320232 | 100320486 | EPO   | no  |
| AAAGCCAGCAGATCCTACGG       | F |    |     |    |           |           |       |     |
| ACTCACCTCCATCCTCTTCCA      | R | 58 | 174 | 7  | 100319504 | 100319677 | EPO   | no  |
| CCACCCAACCATGTCTTCCA       | F |    |     |    |           |           |       |     |
| GCATCCCACCAAAACAGCTT       | R | 58 | 288 | 9  | 5029845   | 5030132   | JAK2  | no  |
| GGAAGCTTTGTCTTCGTGTCAT     | F |    |     |    |           |           |       |     |
| ATTGGGCCATGACAGTTGCT       | R | 58 | 132 | 9  | 5064906   | 5065037   | JAK2  | no  |
| TCTTGTTCTACTTCGTTCTCCA     | F |    |     |    |           |           |       |     |
| TGAAAAGCTGCACACATGAGT      | R | 58 | 289 | 9  | 5072430   | 5072718   | JAK2  | no  |
| TCAGGGGATTTGTGTTGAGTTTA    | F |    |     |    |           |           |       |     |
| CTGTCCTTGTTGTCAATTGCCA     | R | 58 | 267 | 9  | 5126105   | 5126371   | JAK2  | no  |
| TGACATGTGCCCTGTATTGAA      | F |    |     |    |           |           |       |     |
| TCATCCAGCCATGTTATCCCT      | R | 55 | 202 | 9  | 5126590   | 5126791   | JAK2  | no  |
| CAGCCTGGTGTCTAAGAGC        | F |    |     |    |           |           |       |     |
| ACCCACCCACCTAAAGTA         | R | 58 | 198 | 19 | 11488648  | 11488845  | EPOR  | no  |
| CTCCGACCACTCCTCCATTC       | F |    |     |    |           |           |       |     |
| CCATGGAAGCTGTGTCGC         | R | 58 | 202 | 19 | 11492573  | 11492774  | EPOR  | no  |
| CGCTTCCTCCAGAAACACA        | F |    |     |    |           |           |       |     |
| CCCCATGCCCTTCCTTTGTC       | R | 58 | 118 | 19 | 11493823  | 11493940  | EPOR  | no  |
| AGCGAGTTCTGTGAGTTGCA       | F |    |     |    |           |           |       |     |
| GCCTGTGTCCCGGTAGTC         | R | 58 | 201 | 12 | 111856028 | 111856228 | SH2B3 | yes |
| CGGAGAGGCTGCTGAGAC         | F |    |     |    |           |           |       |     |
| CCTTGGGTGGGTCGAAGA         | R | 58 | 236 | 12 | 111856447 | 111856682 | SH2B3 | yes |
| AGTTGGACTTAGGGAACAAAGGA    | F |    |     |    |           |           |       |     |
| TCCAAGCTAGGCCCTTTTGC       | R | 58 | 242 | 11 | 5246770   | 5247011   | HBB   | no  |
| TCCCATAGACTCACCTGAAGT      | F |    |     |    |           |           |       |     |
| AGAAGTCTGCCGTTACTGCC       | R | 58 | 437 | 11 | 5247793   | 5248229   | HBB   | no  |
| TCATGAGCAGCCCAATGGTT       | F |    |     |    |           |           |       |     |
| GCCAAGGGAAAAGTAAAGGCC      | R | 58 | 499 | 1  | 231556815 | 231557313 | EGLN1 | yes |
| CCTCAAACAGCAGGGGACAT       | F |    |     |    |           |           |       |     |
| CTTGGAAGATGGCAGGGC         | R | 58 | 363 | 19 | 11493676  | 11494038  | EPOR  | no  |
| GAAGCTCGGAACTGTGGGAA       | F |    |     |    |           |           |       |     |
| GACCGTGGCAGTTGATCCAA       | R | 58 | 356 | 7  | 134346368 | 134346723 | BPGM  | no  |
| TTTACTTTTCCCTTGGCCGC       | F |    |     |    |           |           |       |     |
| CAGTAACGGCCCTATCTCT        | R | 58 | 448 | 1  | 231557297 | 231557744 | EGLN1 | yes |
| GTGAGTAGGAGCGGACACTT       | F |    |     |    |           |           |       |     |
| ACACACCTGGTCATCTGTCC       | R | 58 | 300 | 7  | 100320467 | 100320766 | EPO   | no  |
| GGAATCCCTCAGTACCTGCA       | F |    |     |    |           |           |       |     |
| GAGAGAGAGTTCAGACCCA        | R | 58 | 384 | 7  | 134363477 | 134363860 | BPGM  | no  |
| TCTGATGTACCAACCTCACCA      | F |    |     |    |           |           |       |     |
| TCACATGAATGTAAATCAAGAAAACA | R | 58 | 168 | 9  | 5069963   | 5070130   | JAK2  | no  |
| CCAGTACCACACCTGCTA         | F |    |     |    |           |           |       |     |
| AAGCAACAGGAGGAAGAGCT       | R | 58 | 398 | 12 | 58111835  | 58112232  | OS9   | no  |
| GGTCAGAGTTCACATTCGGC       | F |    |     |    |           |           |       |     |
| ATCTCCATGGCTAGGACTGC       | R | 58 | 363 | X  | 44928836  | 44929198  | KDM6A | no  |

|                      |   |    |     |    |           |           |                |     |  |
|----------------------|---|----|-----|----|-----------|-----------|----------------|-----|--|
| CATGAGACATCTGGACCCCA | F |    |     |    |           |           |                |     |  |
| TCTCAGTTGGACCCGAAGAC | R | 58 | 459 | 3  | 44670797  | 44671255  | <i>ZNF197</i>  | yes |  |
| TCTCTCTCGCAGCTCATCTC | F |    |     |    |           |           |                |     |  |
| TCCGTATCTCCTCGCCTTTC | R | 58 | 442 | 10 | 102295595 | 102296036 | <i>HIF1AN</i>  | yes |  |
| TCCAGCTTCATCCTCTTGGG | F |    |     |    |           |           |                |     |  |
| TCTTGCAATACCTCTCCCGG | R | 58 | 424 | 12 | 26275600  | 26276023  | <i>BHLHE41</i> | yes |  |
| TGGGGAATACGTGCTCACTT | F |    |     |    |           |           |                |     |  |
| GACCAAGAGAGACCACACCA | R | 58 | 470 | 12 | 111885306 | 111885775 | <i>SH2B3</i>   | no  |  |
| CGATGGACTTGGTTGTGTGT | F |    |     |    |           |           |                |     |  |
| TTGAGGACTTGCCTTTCAG  | R | 58 | 495 | 14 | 62207107  | 62207601  | <i>HIF1A</i>   | no  |  |
| AGGGACCTTAGCACCAAGTC | F |    |     |    |           |           |                |     |  |
| GGGCTGTATCATGGACCACC | R | 58 | 438 | 19 | 11494456  | 11494893  | <i>EPOR</i>    | no  |  |
| AGCTCAGACTGTTGACCACA | F |    |     |    |           |           |                |     |  |
| AAATGGTGAGGGATGAGGCT | R | 58 | 475 | 19 | 46832351  | 46832825  | <i>HIF3A</i>   | no  |  |
| GAAGAAGACGCGGGGAG    | F |    |     |    |           |           |                |     |  |
| AGCAGCGTCACCTGGAT    | R | 58 | 400 | 3  | 10183607  | 10184006  | <i>VHL</i>     | no  |  |

Official gene symbols according to HUGO Gene Nomenclature Committee are given here. Other gene symbols used frequently in the literature are: *HIF2A* (*EPAS1*), *PHD2* (*EGLN1*), *PHD1* (*EGLN2*), *PHD3* (*EGLN3*), *FIH* (*HIF1AN*), *LNK* (*SH2B3*), *DEC2* (*BHLHE41*).

F indicates forward primer; R, reverse primer; Ta, annealing temperature; bp, base pairs; and Chr, chromosome.

**Table S 2:** Variants identified by whole genome sequencing (WGS500 project)

| Chr | Position  | Ref | Alt | Gene           | Transcript ID | cDNA Change | Protein Change | Genotype        | No of cases | dbSNP142 (allelic freq) | Sample ID                  |
|-----|-----------|-----|-----|----------------|---------------|-------------|----------------|-----------------|-------------|-------------------------|----------------------------|
| 7   | 100318468 | G   | A   | <i>EPO</i>     | NM_000799     | c.-136G>A   | NA             | Het             | 4           | Not found               | PAR07, PAR09, PAR15, PAR16 |
| 7   | 134346528 | G   | A   | <i>BPGM</i>    | NM_001724     | c.G269A     | p.R90H         | Het             | 1           | Not found               | PAR03                      |
| 9   | 135863848 | G   | T   | <i>GFI1B</i>   | NM_004188     | c.G503T     | p.C168F        | Hom             | 1           | rs527297896 (0.001)     | PAR02                      |
| 12  | 26273317  | C   | T   | <i>BHLHE41</i> | NM_030762     | c.*1682G>A  | NA             | Hom             | 2           | rs76268917 (0.038)      | PAR04, PAR12               |
| 12  | 26274410  | T   | C   | <i>BHLHE41</i> | NM_030762     | c.*589A>G   | NA             | Hom             | 2           | rs76306214 (0.036)      | PAR04, PAR12               |
| X   | 44920641  | T   | C   | <i>KDM6A</i>   | NM_021140     | c.T1402C    | p.C468R        | X-linked (Male) | 1           | rs138723332 (0.00132)   | PAR11                      |

Sporadic Cases: PAR02, PAR03, PAR11; Family M: PAR15, PAR16 (affected siblings); Family S: PAR07, PAR09 (affected mother and daughter); Family T: PAR04, PAR12 (distant relatives, both affected). Official gene symbols according to HUGO Gene Nomenclature Committee are given here. Other gene symbols used frequently in the literature are: *DEC2* (*BHLHE41*).

Chr indicates chromosome; Ref, reference allele; Alt, alternate allele; NA, non-applicable; Het, heterozygous; and Hom, homozygous.

**Table S 3:** Amplicons generated by the erythrocytosis gene panel with poor coverage

| Amplicon ID    | Gene           | Gene region | Average No reads | Max N reads | Chr | Start     | End       | Length | Description           |
|----------------|----------------|-------------|------------------|-------------|-----|-----------|-----------|--------|-----------------------|
| AMPL3630659372 | <i>BHLHE41</i> | CDS         | 0.26             | 3           | 12  | 26275506  | 26275647  | 141    | Failed in all samples |
| AMPL3774175241 | <i>KDM6A</i>   | 3'UTR       | 0.31             | 4           | X   | 44971547  | 44971692  | 145    | Failed in all samples |
| AMPL3774508291 | <i>EGLN1</i>   | 5'UTR       | 0.34             | 3           | 1   | 231558051 | 231558231 | 180    | Failed in all samples |
| AMPL3774242165 | <i>EGLN2</i>   | 5'UTR       | 0.55             | 4           | 19  | 41305339  | 41305449  | 110    | Failed in all samples |
| AMPL3630748538 | <i>EGLN2</i>   | 5'UTR       | 0.69             | 15          | 19  | 41304979  | 41305160  | 181    | Failed in all samples |
| AMPL3630468797 | <i>HIF3A</i>   | 5'UTR       | 1.56             | 12          | 19  | 46806842  | 46806957  | 115    | Failed in all samples |

|                       |                |       |       |    |    |           |           |     |                                 |
|-----------------------|----------------|-------|-------|----|----|-----------|-----------|-----|---------------------------------|
| <b>AMPL706138063</b>  | <i>VHL</i>     | CDS   | 1.82  | 7  | 3  | 10183733  | 10183902  | 169 | Failed in all samples           |
| <b>AMPL844175990</b>  | <i>EGLN1</i>   | CDS   | 2.22  | 8  | 1  | 231557578 | 231557757 | 179 | Failed in all samples           |
| <b>AMPL3773690924</b> | <i>HIF3A</i>   | CDS   | 2.82  | 8  | 19 | 46838138  | 46838313  | 175 | Failed in all samples           |
| <b>AMPL3774166343</b> | <i>KDM6A</i>   | CDS   | 4.75  | 18 | X  | 44732714  | 44732847  | 133 | Failed in all samples           |
| <b>AMPL3774152291</b> | <i>EPAS1</i>   | CDS   | 9.37  | 29 | 2  | 46607762  | 46607856  | 94  | Average coverage lower than 20X |
| <b>AMPL3630701854</b> | <i>BHLHE41</i> | CDS   | 9.82  | 44 | 12 | 26275365  | 26275467  | 102 | Average coverage lower than 20X |
| <b>AMPL3774508232</b> | <i>EGLN1</i>   | 5'UTR | 12.41 | 47 | 1  | 231557881 | 231558041 | 160 | Average coverage lower than 20X |
| <b>AMPL2721812404</b> | <i>SH2B3</i>   | 5'UTR | 14.60 | 56 | 12 | 111843727 | 111843905 | 178 | Average coverage lower than 20X |
| <b>AMPL3630680367</b> | <i>GFI1B</i>   | CDS   | 15.82 | 47 | 9  | 135864528 | 135864712 | 184 | Average coverage lower than 20X |
| <b>AMPL3630701704</b> | <i>BHLHE41</i> | CDS   | 16.12 | 63 | 12 | 26275093  | 26275281  | 188 | Average coverage lower than 20X |
| <b>AMPL844172391</b>  | <i>EGLN1</i>   | 5'UTR | 18.88 | 64 | 1  | 231558201 | 231558343 | 142 | Average coverage lower than 20X |

These amplicons are encompassing CDS regions from *BHLHE41*, *EPAS1*, *GFI1B*, *VHL*, *HIF3A* and *KDM6A* genes (1,365bp in total), as well as UTR regions from *EGLN1*, *HIF3A*, *EGLN2*, *SH2B3* and *KDM6A* genes (1,211bp in total). Official gene symbols according to HUGO Gene Nomenclature Committee are given here. Other gene symbols used frequently in the literature are: *HIF2A* (*EPAS1*), *PHD2* (*EGLN1*), *PHD1* (*EGLN2*), *LNK* (*SH2B3*), *DEC2* (*BHLHE41*).

Chr indicates chromosome; CDS, coding DNA sequence; and UTR, untranslated region.

**Table S 4:** Variants in positive controls successfully identified by the erythrocytosis gene panel

| Sample ID | Chr | Position  | Ref | Alt | Genotype | Gene region | Gene           | Transcript ID | cDNA change | Protein change | Previous detection |
|-----------|-----|-----------|-----|-----|----------|-------------|----------------|---------------|-------------|----------------|--------------------|
| C_001     | 19  | 11488877  | C   | T   | Het      | exonic      | <i>EPOR</i>    | NM_000121     | c.G1310A    | p.R437H        | Sanger             |
| C_002     | 1   | 231509737 | A   | G   | Het      | exonic      | <i>EGLN1</i>   | NM_022051     | c.T1000C    | p.W334R        | Sanger             |
| C_003     | 3   | 10191593  | A   | G   | Het      | exonic      | <i>VHL</i>     | NM_000551     | c.A586G     | p.K196E        | Sanger             |
| C_004     | 2   | 46607719  | T   | C   | Het      | exonic      | <i>EPAS1</i>   | NM_001430     | c.T1908C    | p.N636N        | Sanger             |
| PAR02     | 9   | 135863848 | G   | T   | Hom      | exonic      | <i>GFI1B</i>   | NM_004188     | c.G503T     | p.C168F        | WGS                |
| PAR03     | 7   | 134346528 | G   | A   | Het      | exonic      | <i>BPGM</i>    | NM_001724     | c.G269A     | p.R90H         | WGS                |
| PAR11     | X   | 44920641  | T   | C   | Hom      | exonic      | <i>KDM6A</i>   | NM_021140     | c.T1402C    | p.C468R        | WGS                |
| PAR12     | 12  | 26273317  | C   | T   | Hom      | 3'UTR       | <i>BHLHE41</i> | NM_030762     | c.*1682G>A  | NA             | WGS                |
|           | 12  | 26274410  | T   | C   | Hom      | 3'UTR       | <i>BHLHE41</i> | NM_030762     | c.*589A>G   | NA             | WGS                |
| PAR04     | 12  | 26273317  | C   | T   | Hom      | 3'UTR       | <i>BHLHE41</i> | NM_030762     | c.*1682G>A  | NA             | WGS                |
|           | 12  | 26274410  | T   | C   | Hom      | 3'UTR       | <i>BHLHE41</i> | NM_030762     | c.*589A>G   | NA             | WGS                |
| PAR07     | 7   | 100318468 | G   | A   | Het      | 5'UTR       | <i>EPO</i>     | NM_000799     | c.-136G>A   | NA             | WGS                |

Official gene symbols according to HUGO Gene Nomenclature Committee are given here. Other gene symbols used frequently in the literature are: *HIF2A* (*EPAS1*), *PHD2* (*EGLN1*), *DEC2* (*BHLHE41*). Chr indicates chromosome; Ref, reference allele; Alt, alternate allele; Het, heterozygous; Hom, homozygous; NA, non-applicable; and WGS, whole genome sequencing.

**Table S 5:** All 51 variants detected by the erythrocytosis gene panel across 57 out of 125 patients (and validated by Sanger sequencing)

| chr | Position  | Ref  | Alt | Gene           | Transcript ID | cDNA change      | Protein change | Total No of Cases | No of heteroz. | No of homoz. |
|-----|-----------|------|-----|----------------|---------------|------------------|----------------|-------------------|----------------|--------------|
| 1   | 231556799 | A    | G   | <i>EGLN1</i>   | NM_022051     | c.T836C          | p.L279P        | 1                 | 1              | 0            |
| 1   | 231557164 | C    | G   | <i>EGLN1</i>   | NM_022051     | c.G471C          | p.Q157H        | 13                | 12             | 1            |
| 2   | 46574031  | AAGG | A   | <i>EPAS1</i>   | NM_001430     | c.47delAGG       | p.del17E       | 1                 | 1              | 0            |
| 2   | 46607405  | T    | C   | <i>EPAS1</i>   | NM_001430     | c.T1594C         | p.Y532H        | 2                 | 2              | 0            |
| 2   | 46607420  | G    | A   | <i>EPAS1</i>   | NM_001430     | c.G1609A         | p.G537R        | 1                 | 1              | 0            |
| 2   | 46611651  | T    | C   | <i>EPAS1</i>   | NM_001430     | c.T2465C         | p.M822T        | 1                 | 1              | 0            |
| 3   | 10183605  | C    | T   | <i>VHL</i>     | NM_000551     | c.C74T           | p.P25L         | 2                 | 2              | 0            |
| 3   | 10183685  | G    | T   | <i>VHL</i>     | NM_000551     | c.G154T          | p.E52X         | 1                 | 1              | 0            |
| 3   | 10191578  | C    | G   | <i>VHL</i>     | NM_000551     | c.C571G          | p.H191D        | 1                 | 0              | 1            |
| 3   | 10191605  | C    | T   | <i>VHL</i>     | NM_000551     | c.C598T          | p.R200W        | 4                 | 4              | 0            |
| 7   | 100319185 | TC   | T   | <i>EPO</i>     | NM_000799     | c.19delC         | p.P7fs         | 1                 | 1              | 0            |
| 7   | 100319633 | G    | A   | <i>EPO</i>     | NM_000799     | c.G208A          | p.D70N         | 1                 | 1              | 0            |
| 7   | 100320290 | G    | C   | <i>EPO</i>     | NM_000799     | c.G250C          | p.G84R         | 2                 | 2              | 0            |
| 7   | 100320336 | A    | G   | <i>EPO</i>     | NM_000799     | c.A296G          | p.E99G         | 1                 | 1              | 0            |
| 7   | 100320381 | C    | T   | <i>EPO</i>     | NM_000799     | c.C341T          | p.P114L        | 1                 | 2              | 0            |
| 7   | 100320614 | C    | G   | <i>EPO</i>     | NM_000799     | c.C440G          | p.S147C        | 1                 | 1              | 0            |
| 7   | 134346563 | C    | A   | <i>BPGM</i>    | NM_001724     | c.C304A          | p.Q102K        | 1                 | 1              | 0            |
| 9   | 5022168   | G    | A   | <i>JAK2</i>    | NM_004972     | c.G181A          | p.E61K         | 1                 | 1              | 0            |
| 9   | 5029893   | C    | G   | <i>JAK2</i>    | NM_004972     | c.C337G          | p.L113V        | 1                 | 1              | 0            |
| 9   | 5050747   | A    | T   | <i>JAK2</i>    | NM_004972     | c.A530T          | p.E177V        | 1                 | 1              | 0            |
| 9   | 5054775   | G    | C   | <i>JAK2</i>    | NM_004972     | c.G827C          | p.G276A        | 1                 | 1              | 0            |
| 9   | 5065003   | C    | G   | <i>JAK2</i>    | NM_004972     | c.C1177G         | p.L393V        | 3                 | 3              | 0            |
| 9   | 5070026   | AA   | TT  | <i>JAK2</i>    | NM_004972     | c.1615_1616invAA | p.K539L        | 1                 | 1              | 0            |
| 9   | 5072561   | G    | A   | <i>JAK2</i>    | NM_004972     | c.G1711A         | p.G571S        | 1                 | 1              | 0            |
| 9   | 5126343   | G    | A   | <i>JAK2</i>    | NM_004972     | c.G3188A         | p.R1063H       | 1                 | 1              | 0            |
| 9   | 5126715   | A    | G   | <i>JAK2</i>    | NM_004972     | c.A3323G         | p.N1108S       | 2                 | 2              | 0            |
| 11  | 5246832   | T    | G   | <i>HBB</i>     | NM_000518     | c.A440C          | p.H147P        | 1                 | 1              | 0            |
| 11  | 5246840   | G    | C   | <i>HBB</i>     | NM_000518     | c.C432G          | p.H144Q        | 1                 | 1              | 0            |
| 11  | 5246944   | C    | T   | <i>HBB</i>     | NM_000518     | c.G328A          | p.V110M        | 1                 | 1              | 0            |
| 11  | 5247816   | C    | G   | <i>HBB</i>     | NM_000518     | c.G306C          | p.E102D        | 1                 | 1              | 0            |
| 12  | 26276001  | A    | C   | <i>BHLHE41</i> | NM_030762     | c.T447G          | p.F149L        | 1                 | 1              | 0            |
| 12  | 58109559  | G    | A   | <i>OS9</i>     | NM_001261421  | c.G497A          | p.G166D        | 1                 | 1              | 0            |
| 12  | 58112155  | C    | T   | <i>OS9</i>     | NM_001261421  | c.C1265T         | p.S422L        | 1                 | 1              | 0            |
| 12  | 111856181 | G    | A   | <i>SH2B3</i>   | NM_005475     | c.G232A          | p.E78K         | 1                 | 1              | 0            |
| 12  | 111856506 | G    | T   | <i>SH2B3</i>   | NM_005475     | c.G557T          | p.S186I        | 2                 | 2              | 0            |
| 12  | 111856571 | G    | C   | <i>SH2B3</i>   | NM_005475     | c.G622C          | p.E208Q        | 1                 | 1              | 0            |
| 12  | 111884812 | G    | A   | <i>SH2B3</i>   | NM_005475     | c.G901A          | p.E301K        | 1                 | 1              | 0            |
| 12  | 111885310 | G    | A   | <i>SH2B3</i>   | NM_005475     | c.G1198A         | p.E400K        | 1                 | 1              | 0            |
| 12  | 111885466 | C    | T   | <i>SH2B3</i>   | NM_005475     | c.C1243T         | p.R415C        | 1                 | 1              | 0            |
| 14  | 62187212  | G    | C   | <i>HIF1A</i>   | NM_001530     | c.G148C          | p.V50L         | 1                 | 1              | 0            |

|    |          |   |   |       |           |          |         |   |   |   |
|----|----------|---|---|-------|-----------|----------|---------|---|---|---|
| 19 | 11488727 | T | C | EPOR  | NM_000121 | c.A1460G | p.N487S | 2 | 2 | 0 |
| 19 | 11492737 | G | A | EPOR  | NM_000121 | c.C296T  | p.A99V  | 2 | 2 | 0 |
| 19 | 11493887 | C | T | EPOR  | NM_000121 | c.G137A  | p.G46E  | 3 | 3 | 0 |
| 19 | 41306650 | C | T | EGLN2 | NM_053046 | c.C173T  | p.S58L  | 4 | 4 | 0 |
| 19 | 41313427 | G | T | EGLN2 | NM_053046 | c.G1139T | p.R380L | 1 | 1 | 0 |
| 19 | 41313759 | C | T | EGLN2 | NM_053046 | c.C1214T | p.T405M | 1 | 1 | 0 |
| 19 | 46811511 | A | C | HIF3A | NM_022462 | c.A190C  | p.I64L  | 1 | 1 | 0 |
| 19 | 46823777 | C | A | HIF3A | NM_022462 | c.C896A  | p.A299D | 1 | 1 | 0 |
| 19 | 46823803 | C | T | HIF3A | NM_022462 | c.C922T  | p.P308S | 1 | 1 | 0 |
| 19 | 46828843 | T | C | HIF3A | NM_022462 | c.T1180C | p.F394L | 1 | 1 | 0 |
| X  | 44922890 | C | T | KDM6A | NM_021140 | c.C1751T | p.T584M | 1 | 1 | 0 |

Official gene symbols according to HUGO Gene Nomenclature Committee are given here. Other gene symbols used frequently in the literature are: *HIF2A* (*EPAS1*), *PHD2* (*EGLN1*), *PHD1* (*EGLN2*), *LNK* (*SH2B3*), *DEC2* (*BHLHE41*). Chr indicates chromosome; Ref, reference allele and Alt, alternate allele. These variants were subsequently classified in 3 groups: known causal variants related to erythrocytosis (Table 2 in main manuscript), novel variants not found before in erythrocytosis (Table 3 in main manuscript), and likely non-causative polymorphisms (Table S6).

**Table S 6:** Non disease-causing variants detected by the erythrocytosis gene panel, also found in the *in silico* control cohort.

| Chr | Position  | Ref | Alt | Gene  | Transcript ID | cDNA change | Protein change | Genotype | No of cases      | ERY freq | Control freq | Adj Fisher pval |
|-----|-----------|-----|-----|-------|---------------|-------------|----------------|----------|------------------|----------|--------------|-----------------|
| 1   | 231557164 | C   | G   | EGLN1 | NM_022051     | c.G471C     | p.Q157H        | Het/ Hom | 12 Het/<br>1 Hom | 0.056    | 0.053        | 0.8713          |
| 7   | 100319633 | G   | A   | EPO   | NM_000799     | c.G208A     | p.D70N         | Het      | 1                | 0.004    | 0.004        | 1.0000          |
| 7   | 100320381 | C   | T   | EPO   | NM_000799     | c.C341T     | p.P114L        | Het      | 1                | 0.004    | 0.002        | 0.6703          |
| 7   | 100320614 | C   | G   | EPO   | NM_000799     | c.C440G     | p.S147C        | Het      | 1                | 0.004    | 0.0005       | 0.4621          |
| 9   | 5029893   | C   | G   | JAK2  | NM_004972     | c.C337G     | p.L113V        | Het      | 1                | 0.004    | 0.0005       | 0.4621          |
| 9   | 5065003   | C   | G   | JAK2  | NM_004972     | c.C1177G    | p.L393V        | Het      | 3                | 0.012    | 0.012        | 1.0000          |
| 9   | 5126343   | G   | A   | JAK2  | NM_004972     | c.G3188A    | p.R1063H       | Het      | 1                | 0.004    | 0.003        | 0.7561          |
| 9   | 5126715   | A   | G   | JAK2  | NM_004972     | c.A3323G    | p.N1108S       | Het      | 2                | 0.008    | 0.001        | 0.3758          |
| 12  | 58112155  | C   | T   | OS9   | NM_001261421  | c.C1265T    | p.S422L        | Het      | 1                | 0.004    | 0.015        | 0.4621          |
| 12  | 111856506 | G   | T   | SH2B3 | NM_005475     | c.G557T     | p.S186I        | Het      | 1                | 0.008    | 0.188        | 2.83E-17        |
| 14  | 62187212  | G   | C   | HIF1A | NM_001530     | c.G148C     | p.V50L         | Het      | 1                | 0.004    | 0.002        | 0.6329          |
| 19  | 11488727  | T   | C   | EPOR  | NM_000121     | c.A1460G    | p.N487S        | Het      | 2                | 0.008    | 0.003        | 0.4621          |
| 19  | 11492737  | G   | A   | EPOR  | NM_000121     | c.C296T     | p.A99V         | Het      | 2                | 0.008    | 0.004        | 0.4621          |
| 19  | 11493887  | C   | T   | EPOR  | NM_000121     | c.G137A     | p.G46E         | Het      | 3                | 0.012    | 0.003        | 0.3929          |
| 19  | 41306650  | C   | T   | EGLN2 | NM_053046     | c.C173T     | p.S58L         | Het      | 3                | 0.016    | 0.014        | 0.8713          |
| 19  | 41313759  | C   | T   | EGLN2 | NM_053046     | c.C1214T    | p.T405M        | Het      | 1                | 0.004    | 0.001        | 0.4621          |
| 19  | 46823803  | C   | T   | HIF3A | NM_022462     | c.C922T     | p.P308S        | Het      | 1                | 0.004    | 0.014        | 0.4621          |
| 19  | 46828843  | T   | C   | HIF3A | NM_022462     | c.T1180C    | p.F394L        | Het      | 1                | 0.004    | 0.029        | 0.1730          |
| X   | 44922890  | C   | T   | KDM6A | NM_021140     | c.C1751T    | p.T584M        | Het      | 1*               | 0.004    | 0.001        | 0.4621          |

Variant calling files from 1000 Genomes project, generated by integration of exome and low coverage data across 1041 individuals, were downloaded from [ftp://ftp.1000genomes.ebi.ac.uk/vol1/ftp/phase1/analysis\\_results/consensus\\_call\\_sets/snps](ftp://ftp.1000genomes.ebi.ac.uk/vol1/ftp/phase1/analysis_results/consensus_call_sets/snps). Vcf tools were used to extract the variants identified within the coordinates of the amplicons generated by Ampliseq gene panel. The variants were annotated with ANNOVAR and filtered following the same criteria described previously for erythrocytosis cohort and Ion Torrent sequencing data. Common variants between the erythrocytosis and *in silico* control cohorts were identified and differences in their allelic frequencies were assessed with Fisher exact test followed by Benjamini and Hochberg false discovery correction (all analysis were performed using RStudio)<sup>18</sup>.

Official gene symbols according to HUGO Gene Nomenclature Committee are given here. Other gene symbols used frequently in the literature are: *PHD2* (*EGLN1*), *PHD1* (*EGLN2*), *LNK* (*SH2B3*). Chr indicates chromosome; Ref, reference allele; Alt, alternate allele; Het, heterozygous and Hom, homozygous.

\*this patient is a female

## References:

1. Taylor JC, Martin HC, Lise S, et al. Factors influencing success of clinical genome sequencing across a broad spectrum of disorders. *Nat Genet.* 2015;47(7):717-726.
2. Lunter G, Goodson M. Stampy: a statistical algorithm for sensitive and fast mapping of Illumina sequence reads. *Genome Res.* 2011;21(6):936-939.
3. Rimmer A MI, Lunter G and McVean G.(2012) Platypus: An Integrated Variant Caller. 2012.
4. Wang K, Li M, Hakonarson H. ANNOVAR: functional annotation of genetic variants from high-throughput sequencing data. *Nucleic Acids Res.* 2010;38(16):e164.
5. Petousi N, Copley RR, Lappin TR, et al. Erythrocytosis associated with a novel missense mutation in the BPGM gene. *Haematologica.* 2014;99(10):e201-204.
6. Lemarchandel V, Joulin V, Valentin C, et al. Compound heterozygosity in a complete erythrocyte bisphosphoglycerate mutase deficiency. *Blood.* 1992;80(10):2643-2649.
7. Lorenzo V FR, Rebecca M, Sabina S, Kimberly H, Karl V, Josef P. A Novel EPO Gene Mutation In a Family With Autosomal Dominant Polycythemia. 55th ASH Annual Meeting and Exposition; New Orleans, LA; 2013.
8. Saleque S, Kim J, Rooke HM, Orkin SH. Epigenetic regulation of hematopoietic differentiation by Gfi-1 and Gfi-1b is mediated by the cofactors CoREST and LSD1. *Mol Cell.* 2007;27(4):562-572.
9. Saleque S, Cameron S, Orkin SH. The zinc-finger proto-oncogene Gfi-1b is essential for development of the erythroid and megakaryocytic lineages. *Genes Dev.* 2002;16(3):301-306.
10. Xia X, Lemieux ME, Li W, et al. Integrative analysis of HIF binding and transactivation reveals its role in maintaining histone methylation homeostasis. *Proc Natl Acad Sci U S A.* 2009;106(11):4260-4265.
11. van Haaften G, Dalgliesh GL, Davies H, et al. Somatic mutations of the histone H3K27 demethylase gene UTX in human cancer. *Nat Genet.* 2009;41(5):521-523.
12. Dalgliesh GL, Furge K, Greenman C, et al. Systematic sequencing of renal carcinoma reveals inactivation of histone modifying genes. *Nature.* 2010;463(7279):360-363.
13. Miyake N, Mizuno S, Okamoto N, et al. KDM6A Point Mutations Cause Kabuki Syndrome. *Hum Mutat.* 2012;
14. Lederer D, Grisart B, Digilio MC, et al. Deletion of KDM6A, a histone demethylase interacting with MLL2, in three patients with Kabuki syndrome. *Am J Hum Genet.* 2012;90(1):119-124.
15. Montagner M, Enzo E, Forcato M, et al. SHARP1 suppresses breast cancer metastasis by promoting degradation of hypoxia-inducible factors. *Nature.* 2012;487(7407):380-384.
16. Jessop L BP, Machiela M, Myers T, Sikdar N, Colli L, and Chanock S. Abstract 5061: Post-GWAS functional characterization of the 12p11.23 renal cancer susceptibility locus implicates BHLHE41. *Cancer Research;* 2014.
17. Huerta-Sanchez E, Degiorgio M, Pagani L, et al. Genetic signatures reveal high-altitude adaptation in a set of ethiopian populations. *Mol Biol Evol.* 2013;30(8):1877-1888.
18. Benjamini Y, Hochberg Y. Controlling the False Discovery Rate - a Practical and Powerful Approach to Multiple Testing. *Journal of the Royal Statistical Society Series B-Methodological.* 1995;57(1):289-300.

# Figure S1

University Medical Center, Ulm, Germany

## A. Samples referred to the Center from other hematology clinics

- Referring physicians excluded PV based on accepted criteria at the time
- Referring physicians excluded causes for **acquired secondary erythrocytosis**
- Hb analysis (e.g. electrophoresis) performed in majority

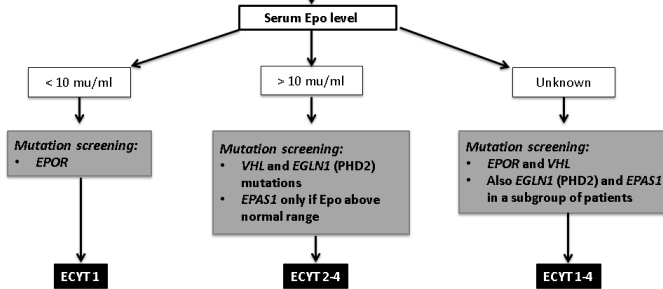

## B. Samples diagnosed directly at the clinic of the Center

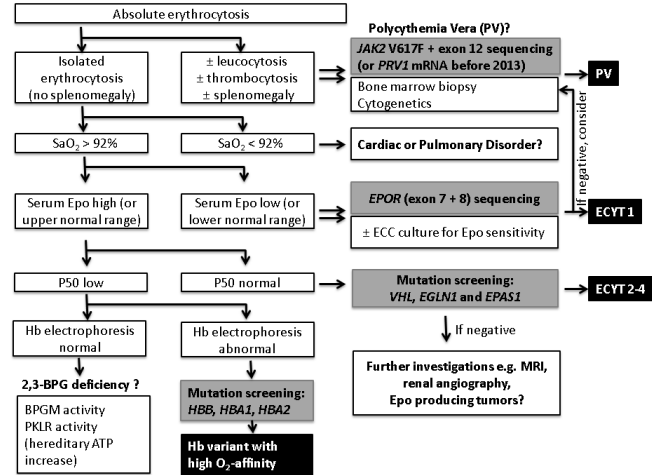

Queen's University, Belfast, United Kingdom

## Consider for further genetic screening patients with:

- Absolute erythrocytosis
- No identifiable secondary cause (e.g. hypoxic lung disease, tumors, renal artery stenosis)
- Exclusion of Polycythemia vera - i.e. no features to suggest PV (e.g. splenomegaly, thrombocytosis, leukocytosis, JAK2 V617F negative, +/- bone marrow studies if appropriate)
- Young patients (predominantly)
- Positive family history

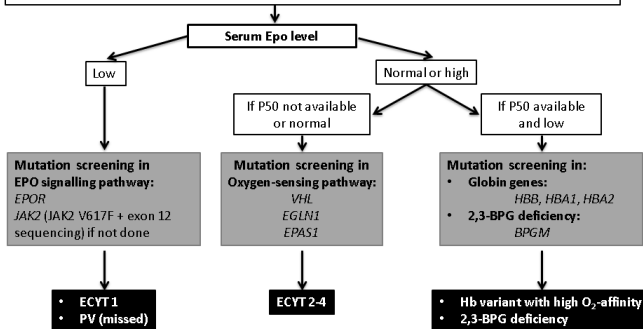

University Medical Center, Utrecht, The Netherlands

## Patients referred with high Hb/Hct

History: symptoms of hyperviscosity, thromboembolisms, smoking  
Examination: cardiac and pulmonary status, splenomegaly

## Look for features of myeloproliferative disorders, e.g. Polycythemia Vera (PV):

White blood cells  
Platelets  
Bone marrow morphology (biopsy)  
± Epo level  
± Cytogenetics  
Erythroid colony culture

BCR-ABL1 gene fusion  
JAK2 V617F mutation (± exon 12 if negative)

## Look for features of acquired secondary erythrocytosis:

Central hypoxia (e.g. chronic lung disease)  
Local Renal hypoxia (e.g. renal artery stenosis)  
Epo-producing tumors

## Screen for congenital secondary erythrocytosis:

Mutation screening:  
• EPO signalling pathway: EPOR  
• Oxygen-sensing pathway: VHL, PHD2, HIF2A  
• Globin genes: HBA1, HBA2, HBB,  
• 2,3-BPG deficiency: BPGM

• ECVT1  
• ECVT2-4  
• Hb variant with high O2-affinity  
• 2,3-BPG deficiency

Centro Hospitalar e Universitário de Coimbra, Portugal

Absolute erythrocytosis  
Normal leukocyte and platelet counts; no splenomegaly  
Secondary acquired (cardiac, pulmonary or renal) causes excluded  
Presence of the JAK2 p.V617F mutation was excluded

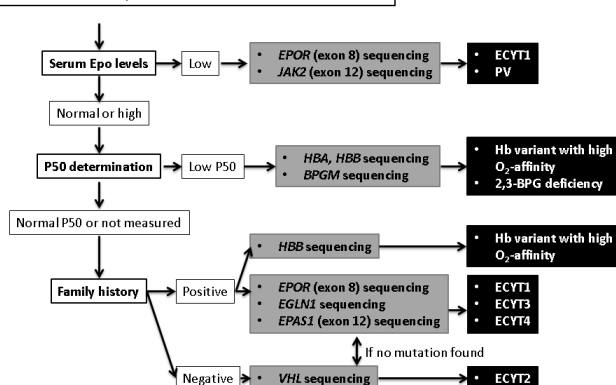

Supplement: 2016.144063.CAMPS_SUPPL.pdf [file 2016.144063.CAMPS_SUPPL.pdf]
